# Supplementary material
Source: PubMed Central journal article supplement (PMC5821206)
Supplement: jciinsight-3-94543-s001.pdf [file jciinsight-3-94543-s001.pdf]

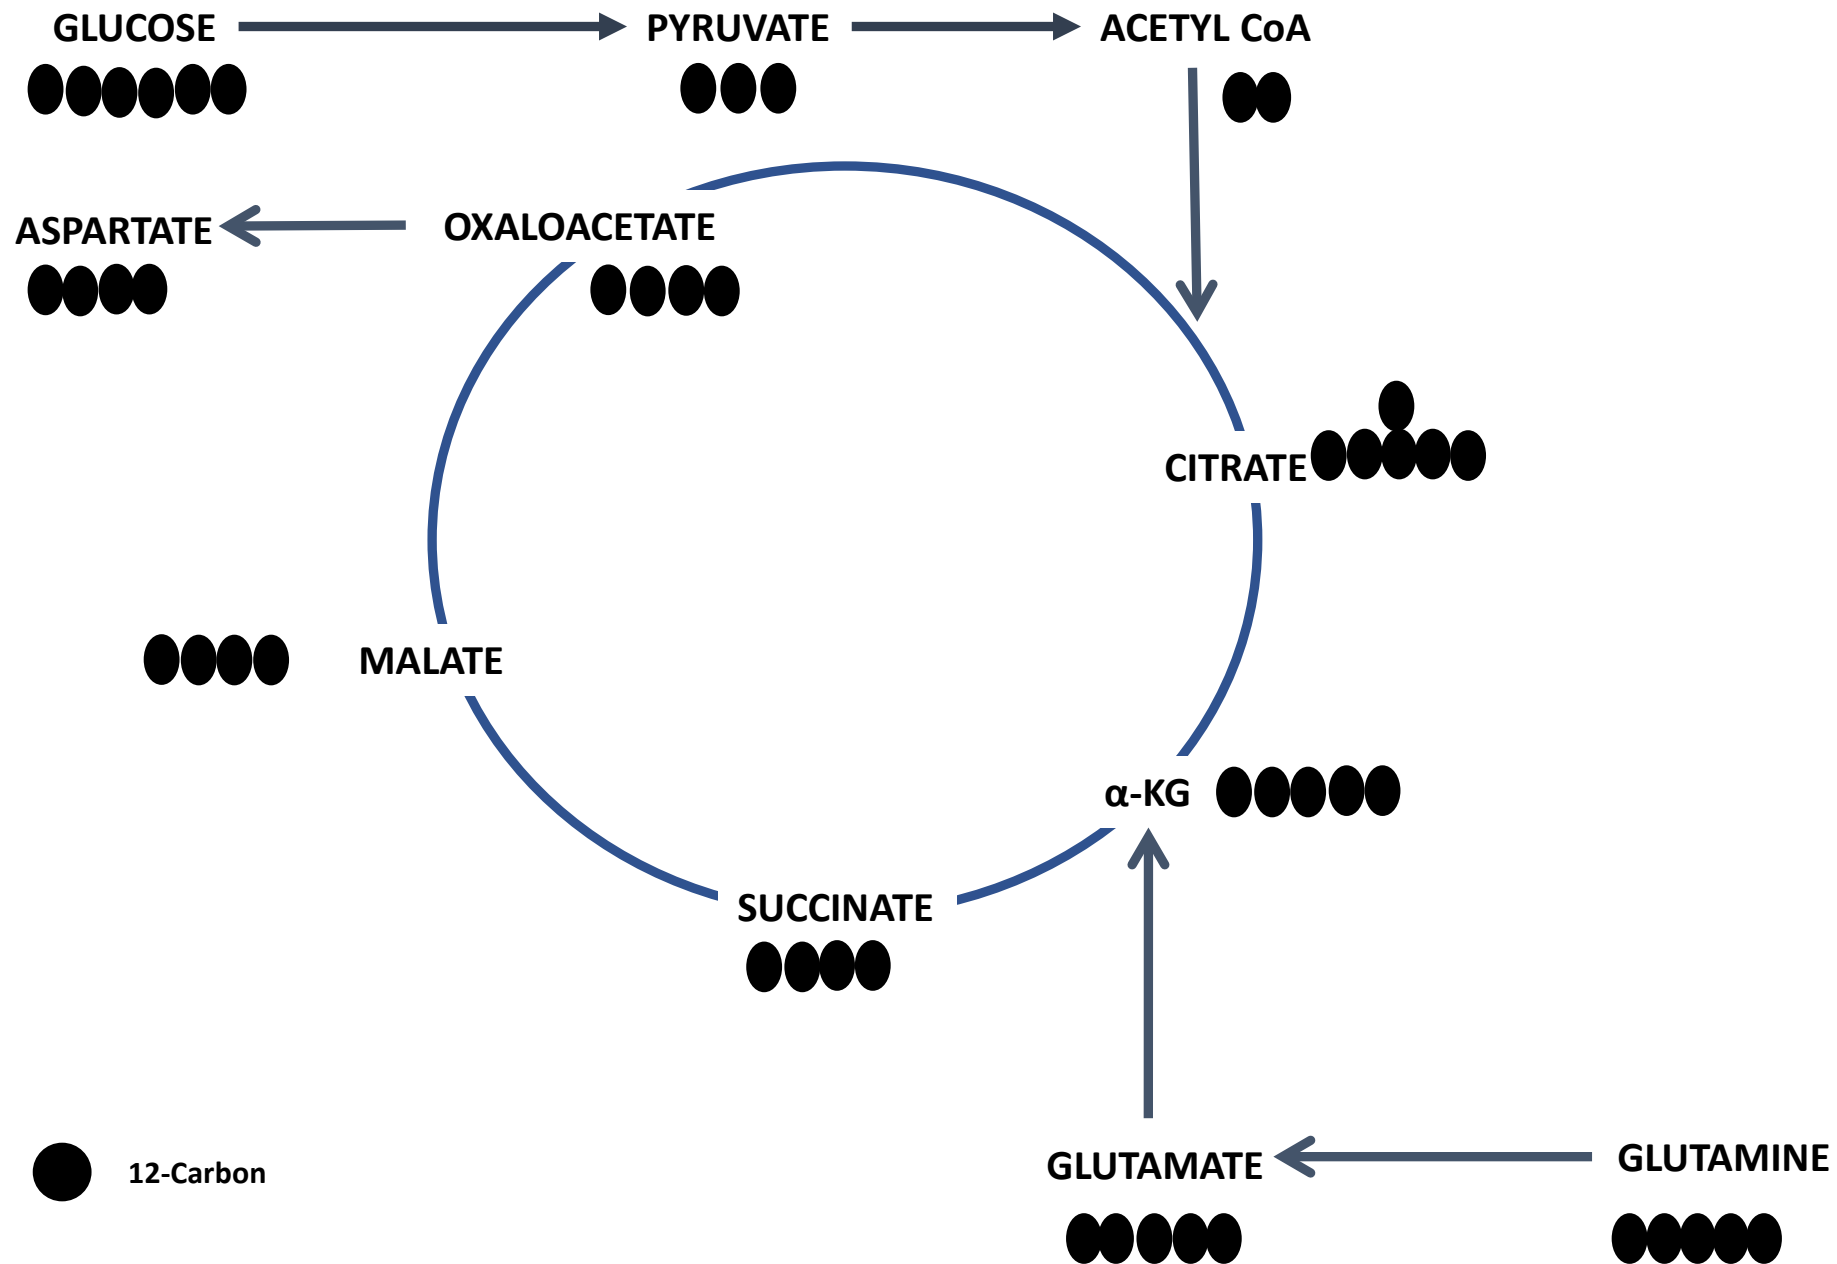

**Supplement Figure 1:** Schema of the TCA cycle and its various intermediates including anaplerotic pathways for glutamine and glucose. Each intermediate is represented by the number of carbon atoms (black filled circles) in their molecular structure.

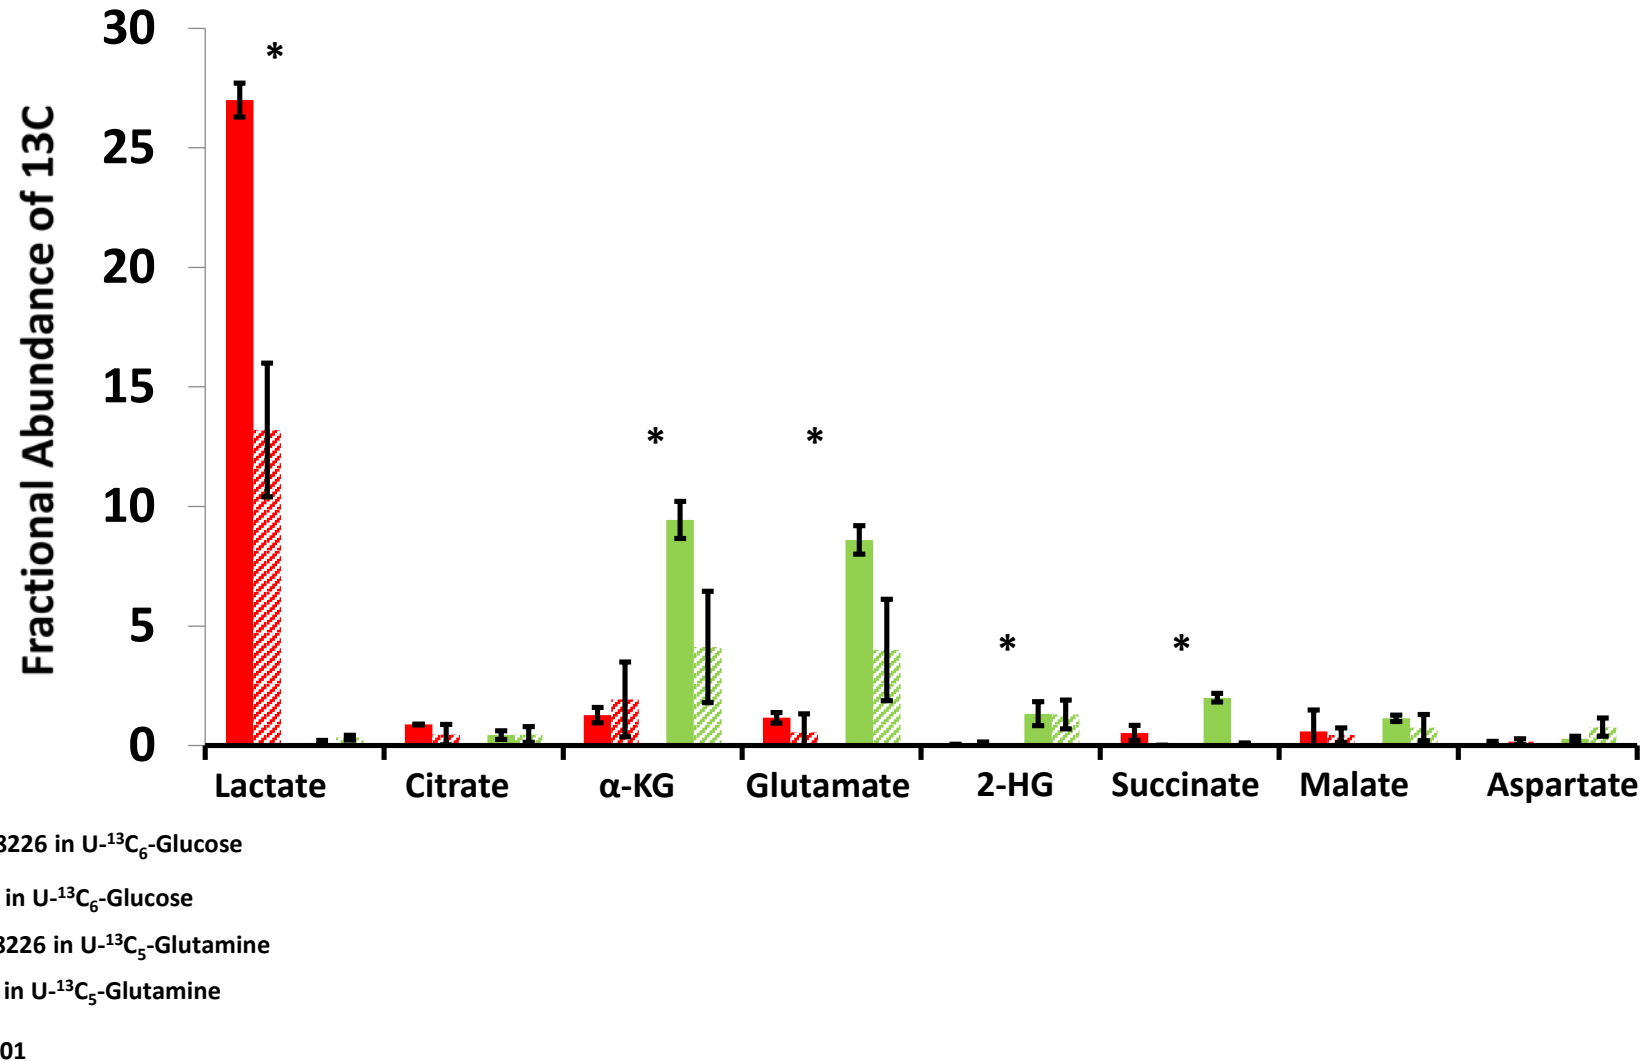

**Supplement Figure 2:** The distribution of the various isotopomers present in the spent media of HMCLs after 24 hours of incubation with either  $\text{U-}^{13}\text{C}_6\text{-Glucose}$  or  $\text{U-}^{13}\text{C}_5\text{-Glutamine}$ . From  $\text{U-}^{13}\text{C}_6\text{-Glucose}$  (red bars): (m+3) Lactate, (m+2) Citrate, (m+2)  $\alpha\text{-KG}$ , (m+2) Glutamate, (m+2) 2-HG, (m+2) Succinate, (m+2) Malate and (m+2) Aspartate. From  $\text{U-}^{13}\text{C}_5\text{-Glutamine}$  (green bars): (m+3) Lactate, (m+4) Citrate, (m+5)  $\alpha\text{-KG}$ , (m+5) Glutamate, (m+5) 2-HG, (m+4) Succinate, (m+4) Malate and (m+4) Aspartate.

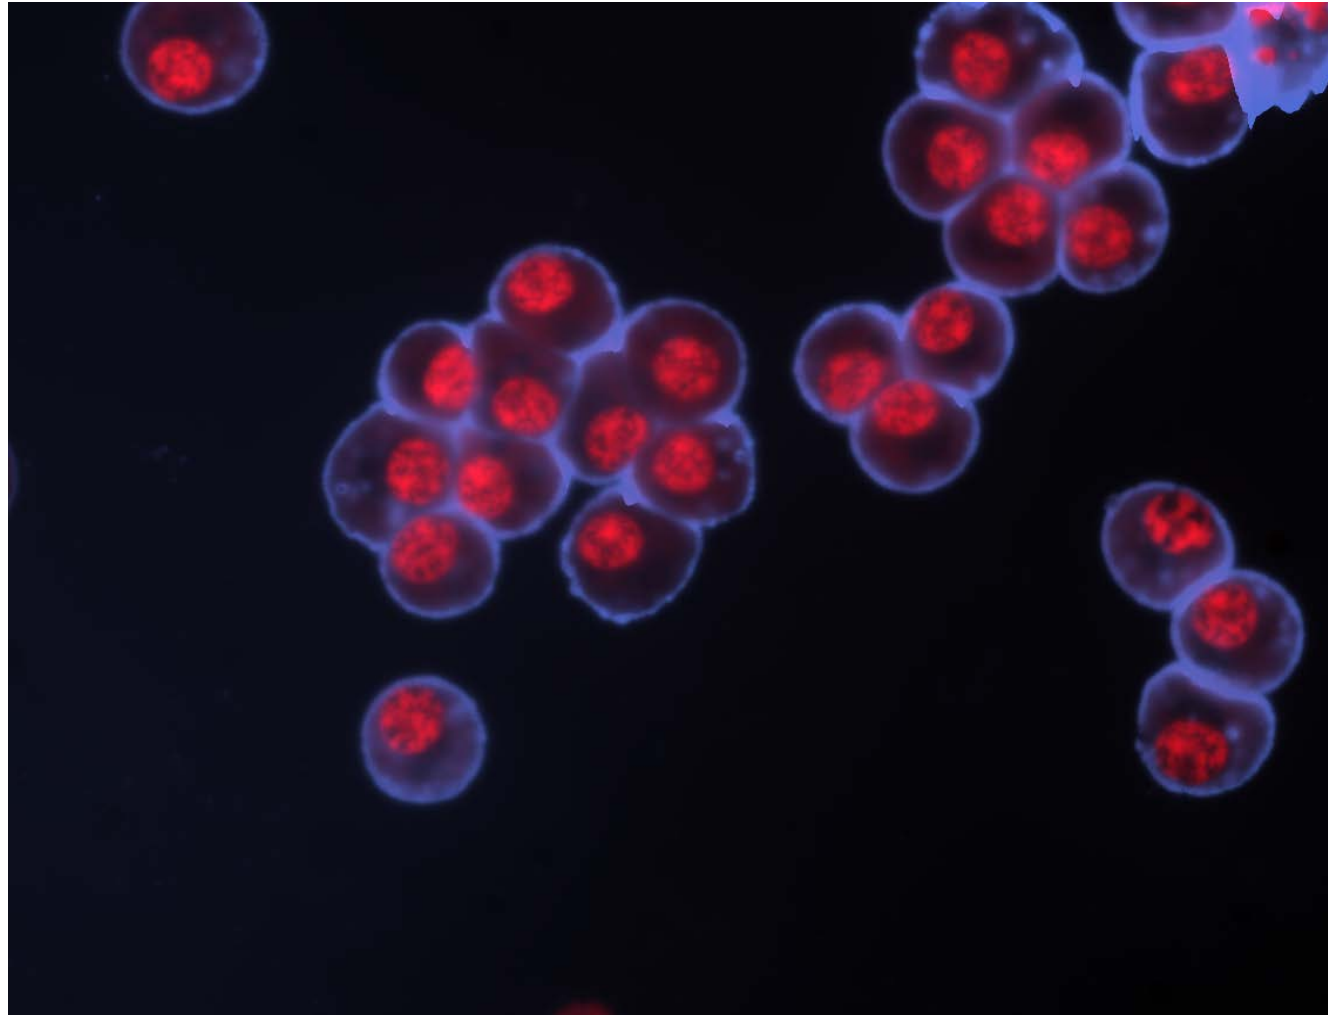

**Supplement Figure 3:** Sample picture of the light chain restriction of plasma cells to confirm clonality. Blue color staining of the membranes represents kappa restriction and green color staining (absent) represents lambda restriction.

**Supplement**

**Figure 4:** Expected mass isotopomer distribution of the intermediates in the TCA cycle as a result of glutamine anaplerosis of U-<sup>13</sup>C<sub>5</sub>-Glutamine. Each intermediate is represented by the number of carbon atoms in their molecular structure with green circle representing <sup>13</sup>C and black circles representing <sup>12</sup>C.

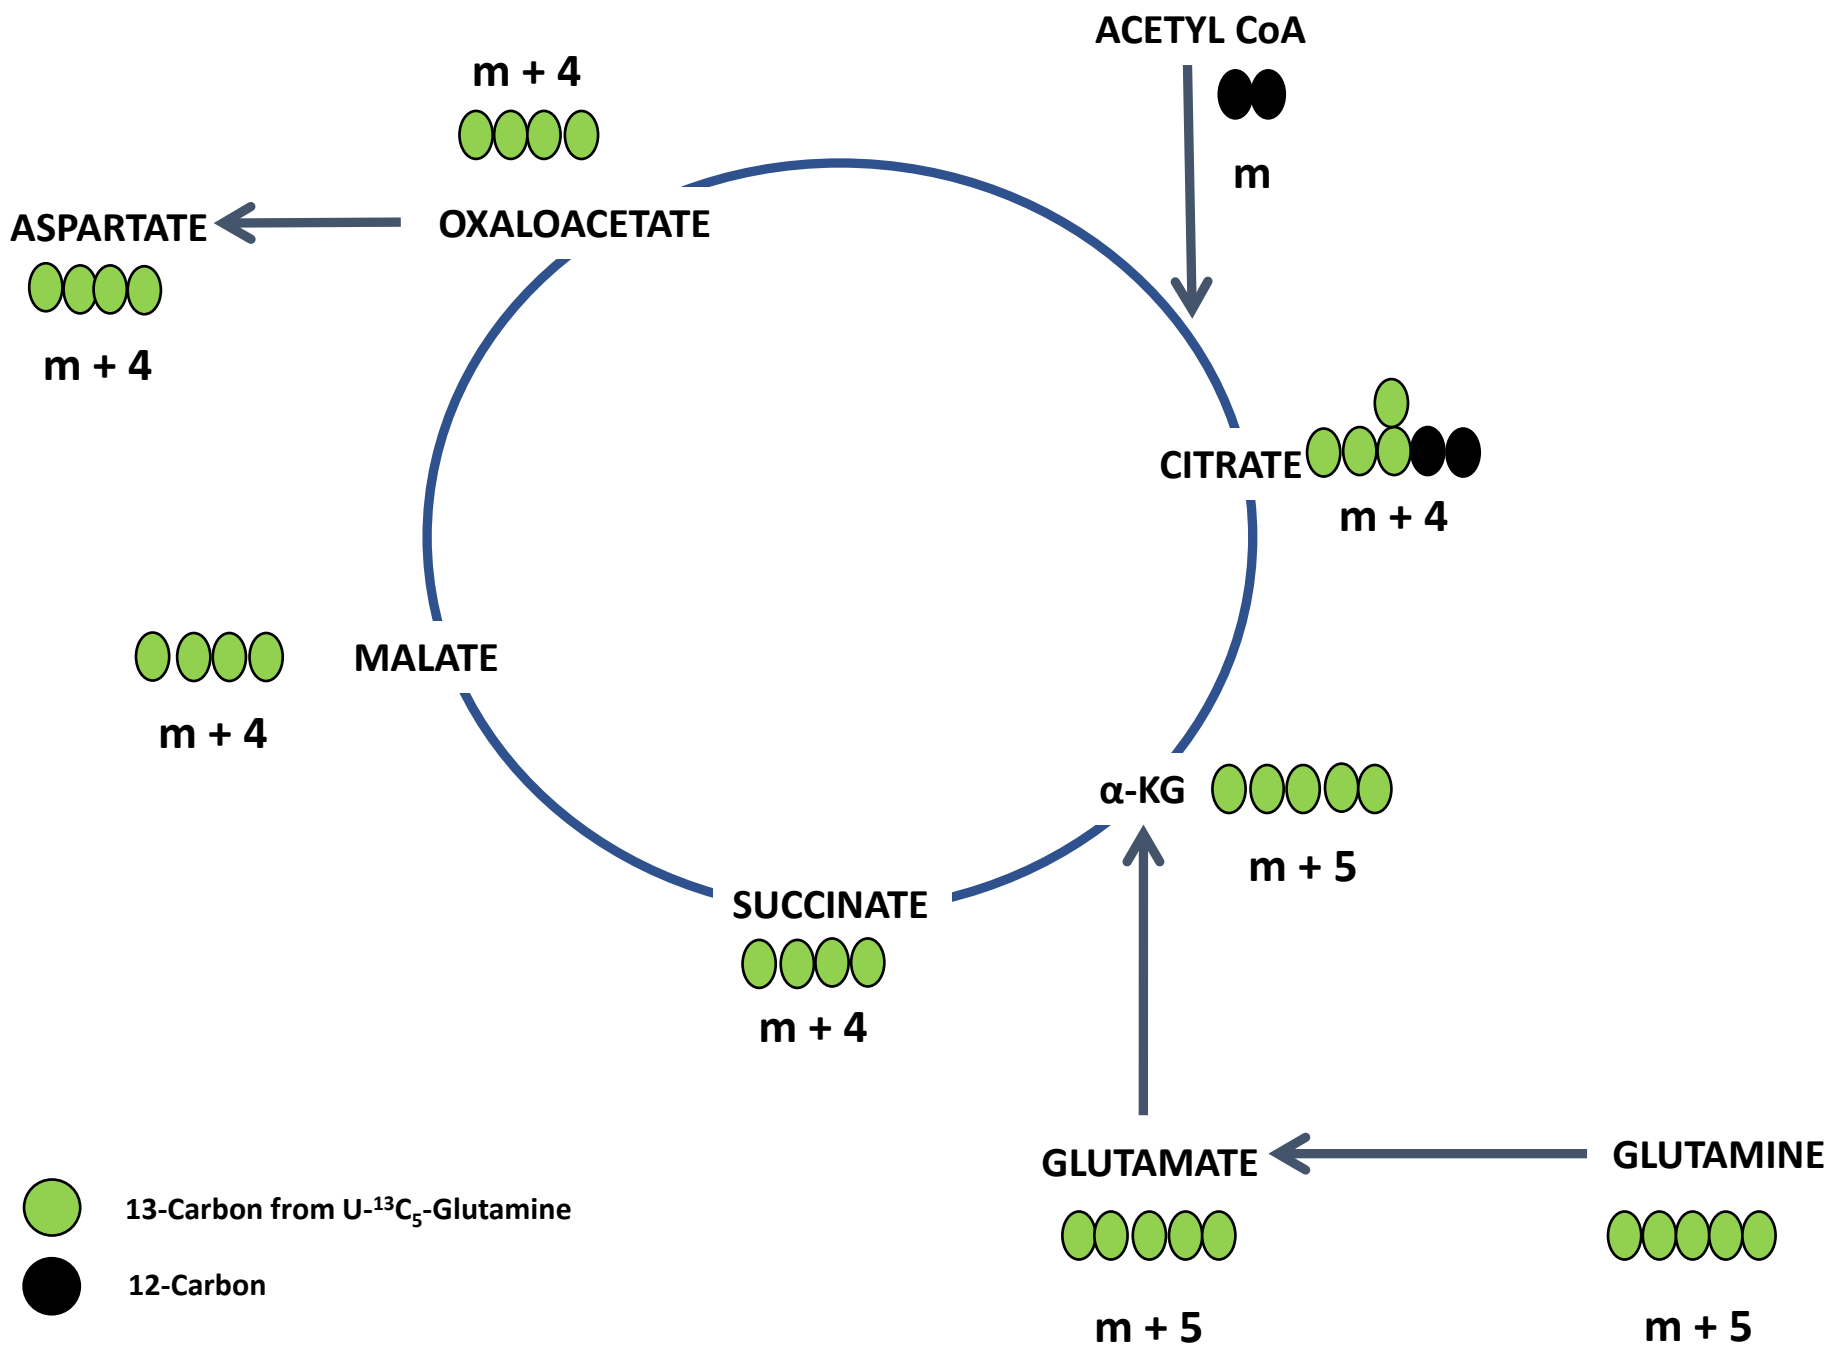

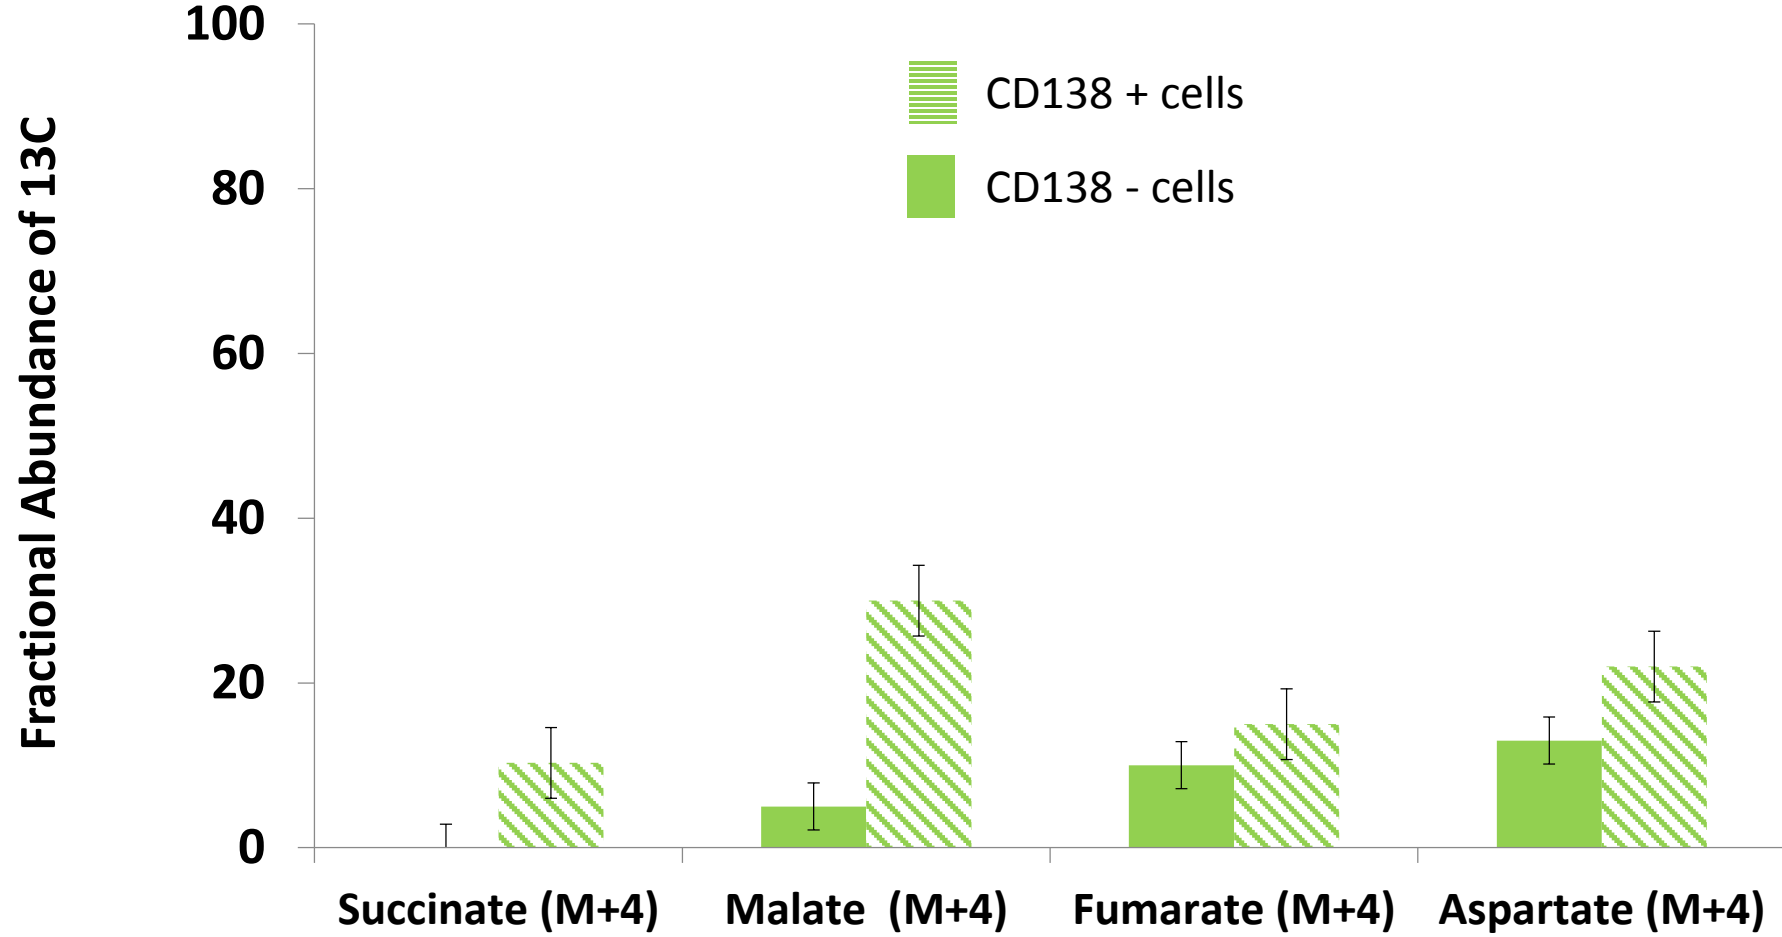

**Supplement Figure 5:** Mass isotopomer distribution of the various TCA cycle intermediates as a result of *ex vivo* glutamine anaplerosis of U-<sup>13</sup>C<sub>5</sub>-Glutamine into CD138 positive and CD138 negative cells derived from the bone marrow aspirates of one of the patients with MM.

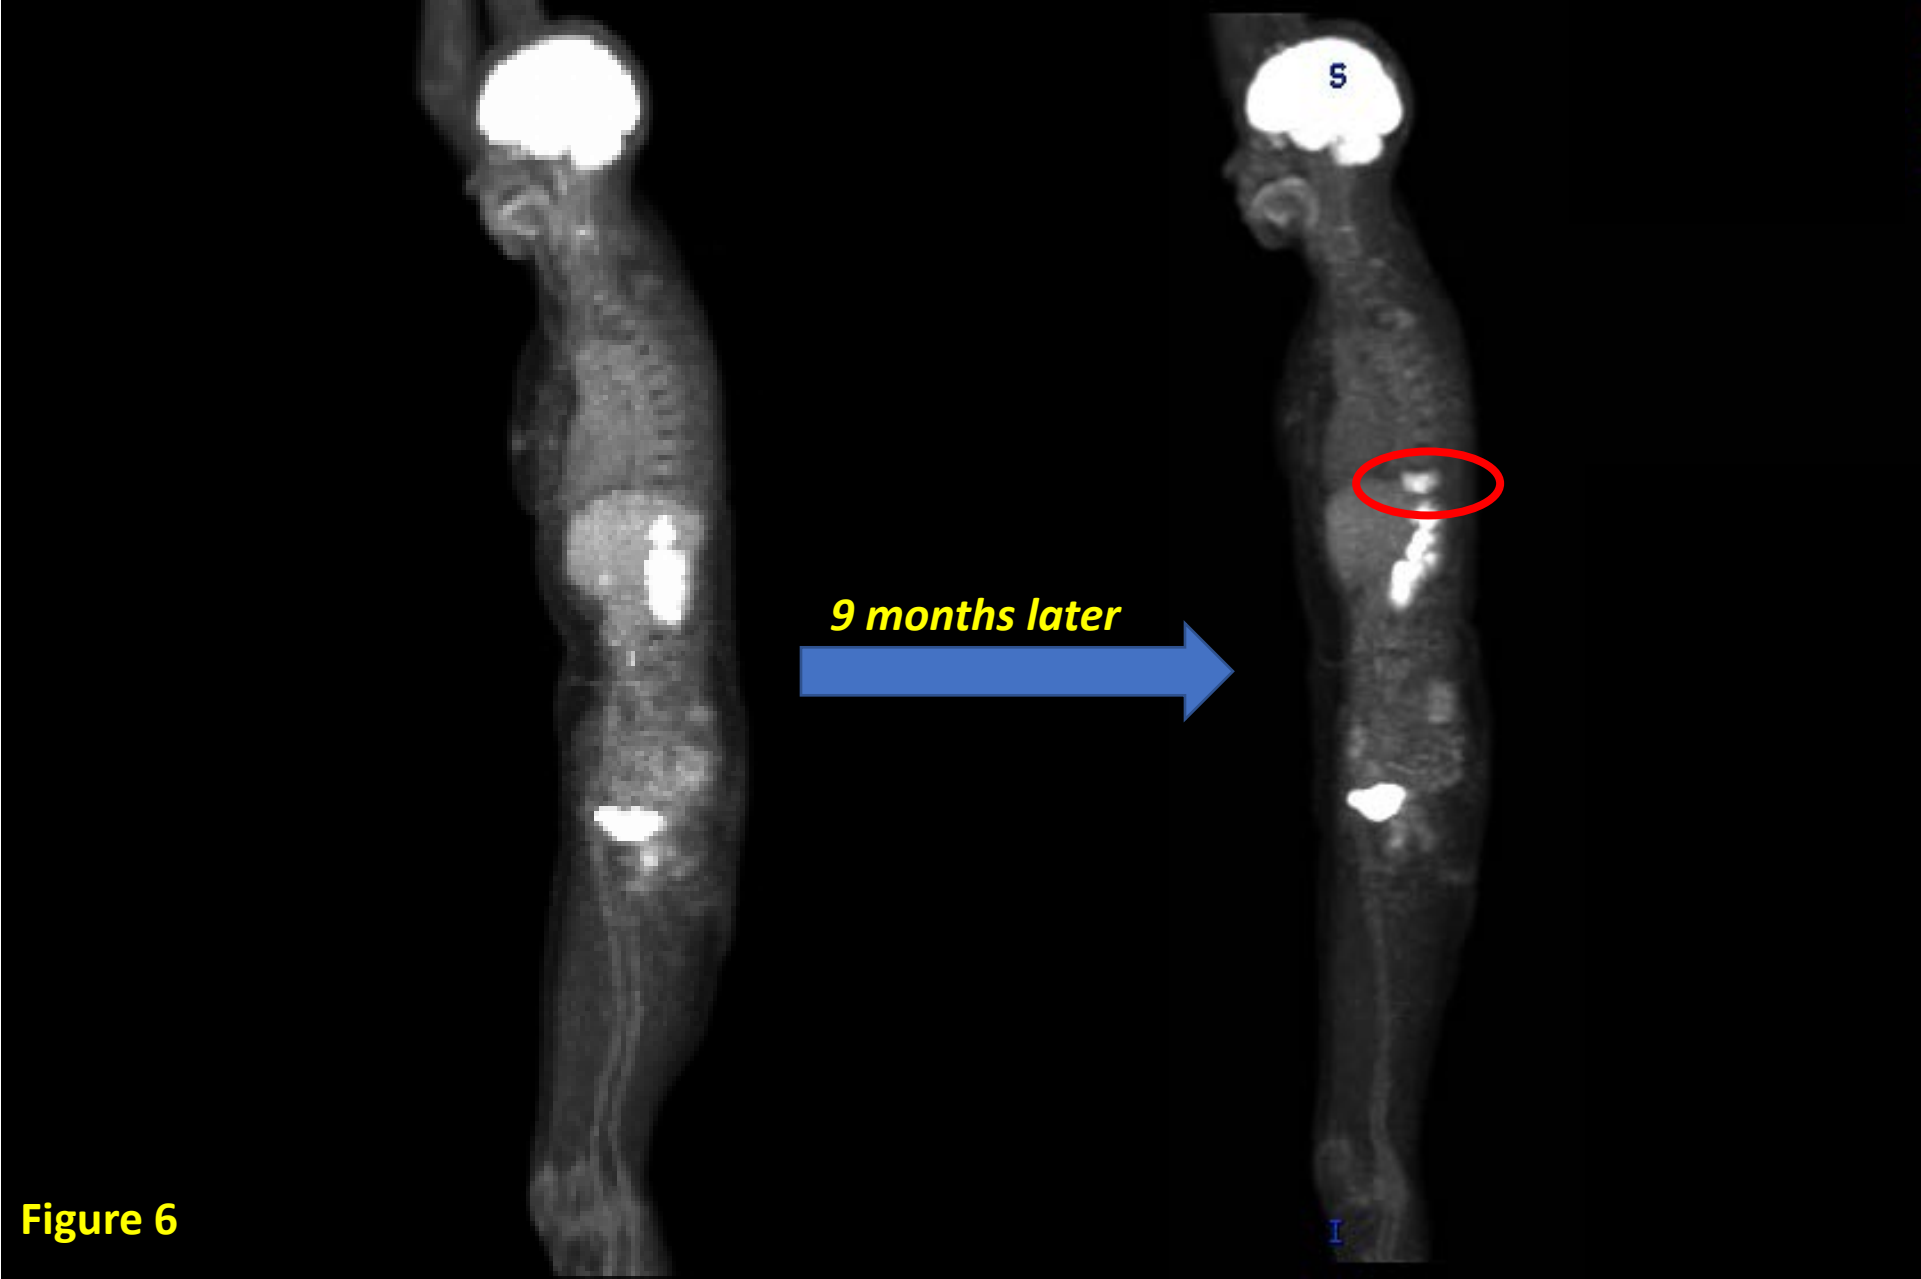

**Figure 6**

**Supplement Figure 6:** PET/CT images of a sample patient with SMM at diagnosis (left) and 9 months later at the time of progression to MM with a symptomatic lytic thoracic vertebrae bone lesion highlighted by the red circle (right).

**Supplementary Table 1: Clinical characteristics of the four patients with newly diagnosed or relapsed MM whose bone marrow PCs underwent *ex vivo* SIRM evaluation**

| Clinical Characteristics | Patient #1               | Patient #2 | Patient #3 | Patient #4 |
|--------------------------|--------------------------|------------|------------|------------|
| Stage of Disease         | Relapsed                 | Relapsed   | Newly Dx   | Newly Dx   |
| Age                      | 70                       | 71         | 64         | 55         |
| Gender                   | Female                   | Male       | Male       | Female     |
| BMPCs                    | 95%                      | 10%        | 40%        | 80%        |
| FISH                     | Del 17p,<br>t(4;14), +1q | Del 17p    | Trisomies  | +1q        |
| S-Phase                  | 0.7%                     | 5.1%       | 1.2%       | 0.8%       |
| Paraprotein Type         | IgA Kappa                | Kappa only | IgG Kappa  | IgA Lambda |
| Hemoglobin               | 8.1 g/dL                 | 13.3 g/dL  | 13.0 g/dL  | 10.7 g/dL  |
| Calcium                  | 9.8 mg/dL                | 9.1 mg/dL  | 9.3 mg/dL  | 10.2 mg/dL |
| Creatinine               | 0.9 mg/dL                | 1.5 mg/dL  | 1.1 mg/dL  | 0.8 mg/dL  |

**Supplementary Table 2: Clinical characteristics of patients with MGUS and MM whose bone marrow plasma underwent assessment of TCA metabolite concentrations**

|                | <b>Age</b> | <b>Gender</b> | <b>BMPC (%)</b> | <b>Glutamate <math>\mu\text{M}</math></b> | <b>2-HG <math>\mu\text{M}</math></b> | <b><math>\alpha</math>-KG <math>\mu\text{M}</math></b> |
|----------------|------------|---------------|-----------------|-------------------------------------------|--------------------------------------|--------------------------------------------------------|
| <b>MGUS #1</b> | 75         | M             | 5               | 50                                        | 0.2                                  | 12                                                     |
| <b>MGUS #2</b> | 44         | M             | 0               | 91                                        | 0.2                                  | 8                                                      |
| <b>MGUS #3</b> | 73         | F             | 5               | 30                                        | 0.7                                  | 19                                                     |
| <b>MGUS #4</b> | 53         | F             | 0               | 105                                       | 0.2                                  | 11                                                     |
| <b>MGUS #5</b> | 63         | F             | 5               | 60                                        | 0.2                                  | 12                                                     |
| <b>MM #1</b>   | 53         | M             | 5               | 96                                        | 0.4                                  | 8.1                                                    |
| <b>MM #2</b>   | 89         | F             | 60              | 104                                       | 0.4                                  | 9.8                                                    |
| <b>MM #3</b>   | 70         | M             | 10              | 62                                        | 0.5                                  | 5.1                                                    |
| <b>MM #4</b>   | 71         | M             | 20              | 115                                       | 0.3                                  | 13                                                     |
| <b>MM #5</b>   | 52         | M             | 15              | 73                                        | 0.3                                  | 8.2                                                    |
| <b>MM #6</b>   | 69         | F             | < 5             | 55                                        | 0.2                                  | 15.3                                                   |
| <b>MM #7</b>   | 86         | M             | 10              | 27                                        | 0.2                                  | 7.8                                                    |
| <b>MM #8</b>   | 48         | M             | 15              | 68                                        | 0.5                                  | 9.2                                                    |
| <b>MM #9</b>   | 78         | M             | 10              | 21                                        | 0.3                                  | 6.2                                                    |
| <b>MM#10</b>   | 52         | M             | 40              | 119                                       | 0.3                                  | 7.8                                                    |
| <b>MM#11</b>   | 70         | M             | 25              | 47                                        | 0.3                                  | 8.3                                                    |
| <b>MM#12</b>   | 70         | F             | 95              | 81                                        | 0.3                                  | 8.2                                                    |
| <b>MM#13</b>   | 74         | F             | 40              | 87                                        | 1.2                                  | 12.4                                                   |
| <b>MM#14</b>   | 78         | M             | 50              | 60                                        | 0.5                                  | 6.9                                                    |
| <b>MM#15</b>   | 77         | M             | 95              | 128                                       | 0.2                                  | 11.6                                                   |



**Supplementary Table 3: Clinical characteristics of patients with SMM whose bone marrow supernatant underwent assessment of TCA metabolite concentrations**

| Patient # | Age | Gender | BMPC% | Glutamate<br>μM | 2-HG<br>μM | α-KG<br>μM | %PCs w/<br>c-Myc<br>expression | TTP<br>(months) | OS<br>(months)   |
|-----------|-----|--------|-------|-----------------|------------|------------|--------------------------------|-----------------|------------------|
| SMM #1    | 55  | F      | 50%   | 28              | 0.4        | 5.5        | 20                             | 7               | 63               |
| SMM #2    | 68  | F      | 15%   | 70              | 0.5        | 8.4        | 30                             | 6               | 88 <sup>#</sup>  |
| SMM #3    | 38  | M      | 20%   | 133             | 0.2        | 4.4        | 10                             | 107*            | 126 <sup>#</sup> |
| SMM #4    | 64  | M      | 25%   | 127             | 1.4        | 6.1        | 30                             | 7               | 118 <sup>#</sup> |
| SMM #5    | 66  | M      | 30%   | 199             | 1.7        | 9.3        | 50                             | 12              | 103              |
| SMM #6    | 57  | M      | 15%   | 64              | 0.2        | 7.7        | 30                             | 14              | 108 <sup>#</sup> |
| SMM #7    | 57  | M      | 10%   | 243             | 0.3        | 11.6       | 10                             | 114*            | 138 <sup>#</sup> |
| SMM #8    | 64  | F      | 30%   | 158             | 0.3        | 5.6        | 10                             | 69              | 151 <sup>#</sup> |
| SMM #9    | 66  | M      | 50%   | 58              | 0.5        | 6.6        | 50                             | 9               | 107 <sup>#</sup> |
| SMM #10   | 67  | F      | 15%   | 86              | 0.6        | 9.6        | 10                             | 12              | 13               |
| SMM #11   | 30  | F      | 30%   | 299             | 0.6        | 3.3        | 10                             | 122*            | 144 <sup>#</sup> |
| SMM #12   | 66  | M      | 40%   | 61              | 0.5        | 7.0        | 30                             | 2               | 47 <sup>#</sup>  |
| SMM #13   | 82  | M      | 30%   | 32              | 0.3        | 6.7        | 20                             | 11              | 48 <sup>#</sup>  |
| SMM #14   | 72  | F      | 20%   | 48              | 0.3        | 8.4        | 50                             | 5               | 59 <sup>#</sup>  |
| SMM #15   | 71  | M      | 10%   | 39              | 0.3        | 5.7        | 10                             | 62*             | 68 <sup>#</sup>  |
| SMM #16   | 54  | F      | 15%   | 403             | 0.2        | 0.3        | 10                             | 7               | 59               |
| SMM #17   | 61  | M      | 15%   | 42              | 0.3        | 5.0        | 40                             | 57              | 96 <sup>#</sup>  |
| SMM #18   | 60  | F      | 10%   | 74              | 0.3        | 8.0        | 30                             | 68*             | 86 <sup>#</sup>  |
| SMM #19   | 79  | M      | 50%   | 42              | 4.2        | 6.9        | 20                             | 3               | 50 <sup>#</sup>  |
| SMM #20   | 60  | F      | 20%   | 31              | 0.3        | 7.0        | 10                             | 8               | 45               |
| SMM #21   | 61  | M      | 15%   | 36              | 0.4        | 6.3        | 40                             | 60*             | 90 <sup>#</sup>  |
| SMM #22   | 67  | F      | 40%   | 195             | 0.3        | 0.6        | 20                             | 6               | 83               |
| SMM #23   | 62  | F      | 30%   | 76              | 0.3        | 7.2        | 10                             | 58*             | 84 <sup>#</sup>  |
| SMM #24   | 80  | F      | 50%   | 37              | 0.2        | 5.5        | 10                             | 19              | 45               |
| SMM #25   | 42  | M      | 10%   | 61              | 0.2        | 4.9        | 10                             | 51*             | 78 <sup>#</sup>  |

\*: Did not progress to MM at last follow up

<sup>#</sup>: Alive at last follow up

**Supplementary Table 4: Clinical characteristics of patients with SMM whose peripheral blood plasma underwent assessment of TCA metabolite concentrations**

| Patient # | Age | Gender | BMPC% | Glutamate<br>μM | 2-HG<br>μM | a-KG<br>μM | TTP<br>(months) | OS<br>(months)   |
|-----------|-----|--------|-------|-----------------|------------|------------|-----------------|------------------|
| SMM #1    | 64  | M      | 25%   | 216             | 0.88       | 0.61       | 7               | 118              |
| SMM #2    | 70  | M      | 20%   | 264             | 0.72       | 4.4        | 124*            | 150 <sup>#</sup> |
| SMM #3    | 66  | M      | 30%   | 445             | 0.79       | 0.27       | 12              | 103              |
| SMM #4    | 58  | M      | 20%   | 415             | 0.98       | 0.23       | 16              | 110              |
| SMM #5    | 58  | M      | 10%   | 472             | 0.65       | 11.60      | 66              | 177 <sup>#</sup> |
| SMM #6    | 67  | F      | 10%   | 420             | 0.49       | 0.93       | 96*             | 96               |
| SMM #7    | 46  | M      | 50%   | 480             | 0.71       | 0.30       | 2               | 64               |
| SMM #8    | 66  | M      | 50%   | 494             | 0.72       | 0.28       | 9               | 107              |
| SMM #9    | 60  | F      | 10%   | 478             | 0.61       | 0.19       | 68*             | 86 <sup>#</sup>  |
| SMM #10   | 73  | F      | 50%   | 455             | 0.54       | 0.21       | 17              | 33               |
| SMM #11   | 67  | F      | 15%   | 404             | 0.82       | 0.25       | 12              | 13               |
| SMM #12   | 61  | M      | 15%   | 409             | 0.41       | 0.29       | 57              | 81               |
| SMM #13   | 66  | M      | 40%   | 108             | 0.74       | 6.42       | 2               | 46 <sup>#</sup>  |
| SMM #14   | 42  | M      | 10%   | 366             | 0.94       | 0.25       | 51*             | 78 <sup>#</sup>  |
| SMM #15   | 82  | M      | 30%   | 204             | 0.43       | 3.99       | 11              | 45 <sup>#</sup>  |
| SMM #16   | 72  | F      | 20%   | 409             | 0.37       | 7.44       | 5               | 58 <sup>#</sup>  |
| SMM #17   | 53  | M      | 20%   | 533             | 0.64       | 1.08       | 2               | 15               |
| SMM #18   | 60  | F      | 20%   | 409             | 0.83       | 0.22       | 8               | 45               |
| SMM #19   | 53  | F      | 15%   | 480             | 1.25       | 0.95       | 212*            | 242              |
| SMM #20   | 56  | F      | 30%   | 487             | 1.23       | 0.41       | 5               | 29               |
| SMM #21   | 40  | M      | 10%   | 552             | 0.49       | 4.63       | 93*             | 93 <sup>#</sup>  |
| SMM #22   | 53  | M      | 40%   | 464             | 0.72       | 0.36       | 5               | 52               |
| SMM #23   | 81  | M      | 30%   | 323             | 4.63       | 1.32       | 2               | 4                |
| SMM #24   | 61  | M      | 15%   | 384             | 0.41       | 0.92       | 57*             | 81 <sup>#</sup>  |
| SMM #25   | 65  | M      | 15%   | 450             | 0.63       | 1.33       | 136             | 168 <sup>#</sup> |

\*: Did not progress to MM at last follow up

<sup>#</sup>: Alive at last follow up
